# Supplementary figures and images for: Evaluation of serum microRNA biomarkers for gastric cancer based on blood and tissue pools profiling: the importance of miR-21 and miR-331
Source: PubMed Central journal article supplement — Br J Cancer. 2017 Jun 22;117(2):266–73. doi: 10.1038/bjc.2017.190 (PMC5520523; doi:10.1038/bjc.2017.190), 2017-06-22

## Tissue

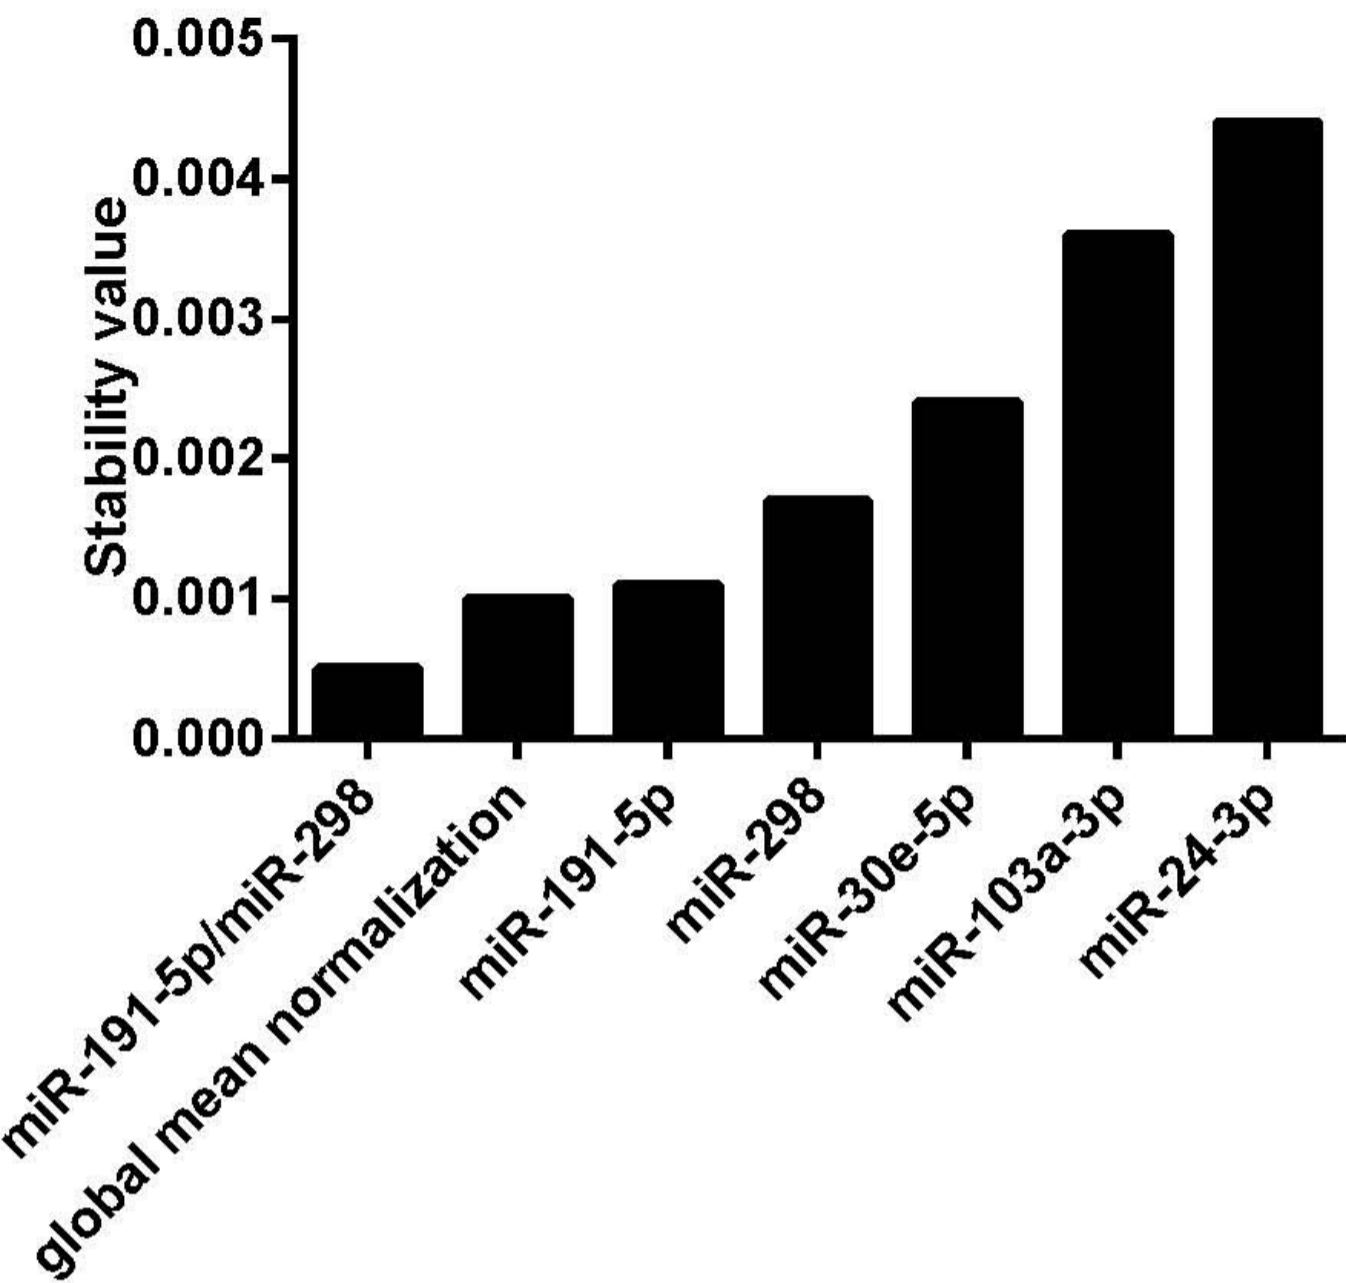

## Serum

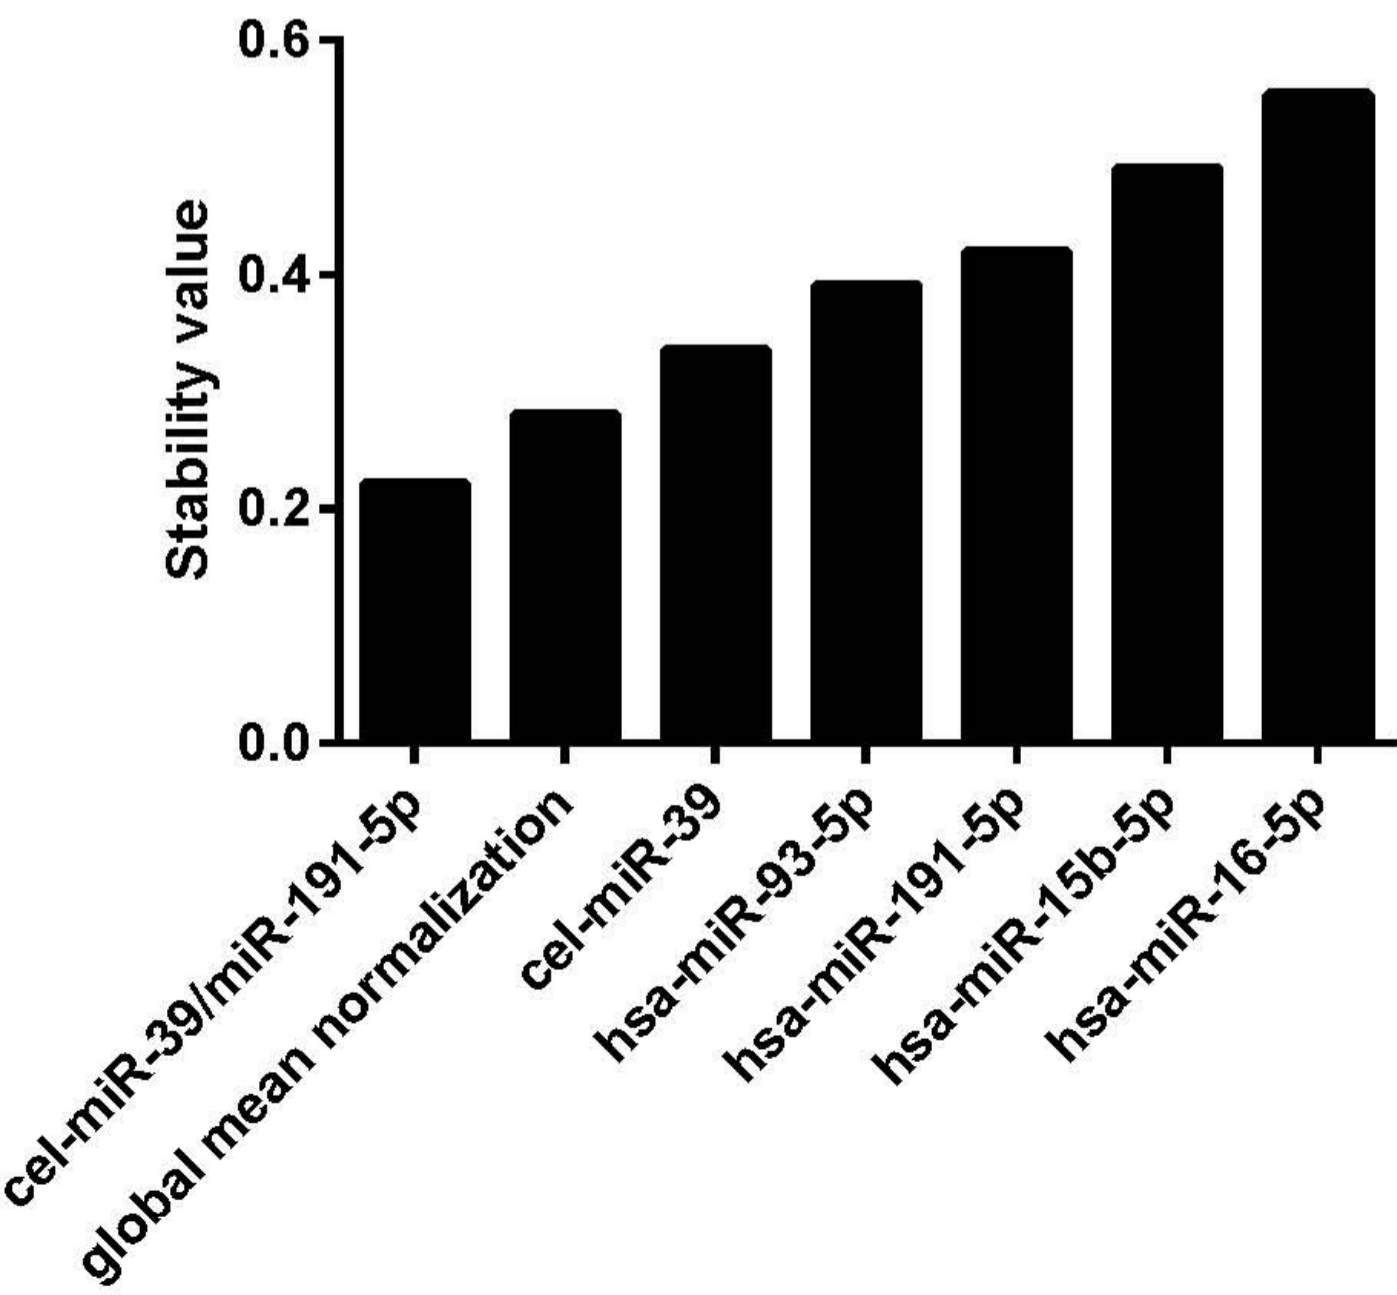

Supplement: bjc2017190x2.pdf [file bjc2017190x2.pdf]
